# Supplementary material
Source: MDPI journal article supplement (https://www.mdpi.com/2071-1050/12/20/8360)
Supplement: s1 [file s1]

## Review

# Integrated and Consolidated Review of Plastic Waste Management and Bio-Based Biodegradable Plastics: Challenges and Opportunities

## Supplementary Material–Policies

**Table S1.** Global Frameworks, Declarations and Conventions Signed to Date to Protect the Marine Environment.

| Framework/Declaration/Commitment                                                                                                 | Date Signed/launched                           | No. of Signatories/Parties                                                  | Targets/Goal                                                                                      | Additional Comments                                                                                                                                                                                          |
|----------------------------------------------------------------------------------------------------------------------------------|------------------------------------------------|-----------------------------------------------------------------------------|---------------------------------------------------------------------------------------------------|--------------------------------------------------------------------------------------------------------------------------------------------------------------------------------------------------------------|
| London Convention on the Prevention of Marine Pollution by Dumping of Wastes and Other Matter [48]                               | 1972                                           | As of March 2018, there are 87 Contracting Parties to the London Convention | To control sea pollution through marine dumping                                                   | The United States of America is a contracting party                                                                                                                                                          |
| OSLO Dumping Convention [47]                                                                                                     | 1972                                           | 13 signatories                                                              | Convention for the Prevention of Marine Pollution by Dumping from Ships and Aircraft              | control dumping of harmful substances from ships and aircraft into the sea, including plastic                                                                                                                |
| International Convention for the Prevention of Marine Pollution from Ships, 1973 (MARPOL 73/78) and its revised Annex V [49,272] | 1973                                           | 174 Member States and 3 Associate Members.                                  | prevention of pollution of the marine environment by ships from operational or accidental causes. | complete ban imposed on the disposal into the sea of all forms of plastics.                                                                                                                                  |
| Paris Convention [50,272]                                                                                                        | 1974                                           | 13 countries                                                                | for the prevention of marine pollution from land-based sources                                    | Replaced by OSPAR Convention of 1992                                                                                                                                                                         |
| Barcelona Convention (The Convention for the Protection of the Mediterranean Sea Against Pollution) [51, 272]                    | Initially adopted in 1976 and amended in 1995. | 22 countries as signatories (a)                                             | To reduce or eliminate marine pollution from sea and land-based sources.                          | Legally Binding Regional Plan on Marine Litter Management. After amendment in 1995, it became known as “Convention for the Protection of the Marine Environment and the Coastal Region of the Mediterranean” |

|                                                                                                                                                                                                               |               |                                                                          |                                                                                                                     |                                                                                                                                      |
|---------------------------------------------------------------------------------------------------------------------------------------------------------------------------------------------------------------|---------------|--------------------------------------------------------------------------|---------------------------------------------------------------------------------------------------------------------|--------------------------------------------------------------------------------------------------------------------------------------|
| Convention on Migratory Species of Wild Animals (Bonn Convention) [273]                                                                                                                                       | 1979          | 129 member states                                                        | preservation of wildlife and habitats                                                                               | Marine animals such as turtles & cetaceans are included.                                                                             |
| The Convention for Cooperation in the Protection, Management and Development of the Marine and Coastal Environment of the Atlantic Coast of the West, Central and Southern Africa Region (Abidjan Convention) | 1981<br>[274] | 22 signatories                                                           | To protect the marine area from Mauritania to South Africa which (14,000 km).                                       | Provides an inclusive legal framework for all programmes in West, Central and Southern Africa                                        |
| United Nations Convention on the Law of the Sea [272,275]                                                                                                                                                     | 1982          | 168 parties& European Union                                              | Prevention and control of marine pollution                                                                          | It is an international agreement birthed during the third United Nations Conference on the Law of the Sea (UNCLOS III)               |
| Cartagena Convention for the Protection and Development of the Marine Environment of the Wider Caribbean Region [276]                                                                                         | 1983          | 26 parties out of 28 countries                                           | Prevent, reduce and control marine pollution from various activities.                                               | It is legally binding.                                                                                                               |
| Nairobi Convention [277]                                                                                                                                                                                      | 1985          | 10 contracting parties                                                   | To protect the Western Indian Ocean Region                                                                          | It is a regional legal framework                                                                                                     |
| The Convention for the Protection of Natural Resources and Environment of the South Pacific Region (Noumea Convention/ SPREP Convention) [278]                                                                | 1986          | 12 Pacific Island Countries                                              | umbrella agreement for the protection, of the marine and coastal environment of the South Pacific Region.           | Regional legal framework of the Action Plan for managing the Natural Resources and Environment of the South Pacific adopted in 1982. |
| Basel Convention on the Control of Transboundary Movements of Hazardous Wastes and their Disposal [42,272]                                                                                                    | 1992          | 187 members, 53 signatories. Haiti and America signed but yet to ratify. | Minimise movement of hazardous waste between countries, especially from developed countries to less developed ones. | Amended in 2019 in to include contaminated plastic waste.                                                                            |
| Bucharest Convention [272,279]                                                                                                                                                                                | 1992          | 6 countries (Bulgaria, Georgia, Romania, Russia, Turkey, Ukraine)        | Convention on the Protection of the Black Sea Against Pollution                                                     | To control land-based pollution sources, waste dumping and working jointly, and to clean accidents.                                  |
| OSPAR Convention [272,280]                                                                                                                                                                                    | 1992          | 15 signatories plus the EU                                               | The Convention for the Protection of the Marine Environment of the North-East Atlantic                              | Combined the Oslo and Paris Conventions (1972 & 1974 respectively).                                                                  |

|                                                                                                 |      |                                                               |                                                                                                            |                                                                                                 |
|-------------------------------------------------------------------------------------------------|------|---------------------------------------------------------------|------------------------------------------------------------------------------------------------------------|-------------------------------------------------------------------------------------------------|
| Helsinki Convention<br>[272,281,282]                                                            | 1992 | 10 contracting parties                                        | To prevent and eradicate marine pollution in the Baltic Sea area                                           | Also known as the Convention on the Protection of the Marine Environment of the Baltic Sea Area |
| Regional action plan on marine litter management (RAPMALI) for the wider Caribbean region [283] | 2008 |                                                               | Management of litter in the Caribbean region                                                               | A regional framework.                                                                           |
| Honolulu Strategy<br>[272,284,285]                                                              | 2011 | Endorsed by 64 governments and the European Commission        | It is a framework for a comprehensive and global effort to prevent, reduce and control marine litter.      | Has three goals and associated strategies                                                       |
| Manilla Declaration<br>[286]                                                                    | 2012 | 65 Governments and the European Commission                    | Protection of the Marine Environment from Land-based Activities                                            | Global Programme of Action                                                                      |
| Rio +20 Declaration [20,272,287]                                                                | 2012 | over 375 participants from 169 organizations and 46 countries | Significant reduction of marine litter                                                                     | Also referred to as Rio Ocean Declaration                                                       |
| United Nations Environment Assembly Resolution 1/6 (UNEA I) [288]                               | 2014 |                                                               | Marine plastic debris and microplastics                                                                    | Followed by another resolution 2/11 (UNEA II) in 2016 also addressing similar issues.           |
| G7 Action Plan to Combat Marine Litter<br>[289]                                                 | 2015 | 7 countries                                                   | Combating marine litter, specifically plastic.                                                             | This was followed by another Action Plan in 2017 by G20 countries.                              |
| CONVENTION ON BIOLOGICAL DIVERSITY (CBD) XIII/10 [272,290]                                      | 2016 | 196 states                                                    | Addressing impacts of marine debris.                                                                       | anthropogenic underwater noise on marine and coastal biodiversity is also assessed              |
| G7 Ise-Shima Leaders' Declaration<br>[272]                                                      | 2016 | 7 countries                                                   | prevention and reduction of marine litter, specifically plastic, from land-based sources.                  | Advocating for efforts on resource efficiency and the 3Rs (Reduce, Reuse, Recycle)              |
| G20 Action Plan on Marine Litter [272]                                                          | 2017 | 19 countries and the European Union.                          | To significantly reduce and prevent marine litter by 2025 in support of the United Nations' SDG 14 target. | It is voluntary, not legally binding, countries do not feel compelled to act.                   |

|                                                |      |                                         |                                                                                                                                 |                                                                                                                |
|------------------------------------------------|------|-----------------------------------------|---------------------------------------------------------------------------------------------------------------------------------|----------------------------------------------------------------------------------------------------------------|
| Global Network of the Committed (GNC)<br>[272] | 2017 | 19 countries and the<br>European Union. | A platform to assist in the<br>implementation of the G20<br>Action Plan. Its goal is to<br>address marine litter                | Voluntary. Its linked to the<br>UNEP's Global Partnership on<br>Marine Litter (GPML)                           |
| Osaka Blue Ocean Vision G20 [291]              | 2019 | 19 countries and the<br>European Union. | To reduce additional<br>pollution by marine plastic<br>litter to zero by 2050<br>through a comprehensive<br>life-cycle approach | Builds on to the 2017 Action<br>Plan. Remains voluntary. The<br>importance of plastic is also<br>acknowledged. |
